# Supplementary material for: Does Vaccine Confidence Mediate the Relationship between Vaccine Literacy and Influenza Vaccination? Exploring Determinants of Vaccination among Staff Members of Nursing Homes in Tuscany, Italy, during the COVID-19 Pandemic
Source: MDPI journal article supplement (doi:10.3390/vaccines11081375), 2023-08-17
Supplement: s1 [file s1]

# Supplementary File S1: HLVa-IT

## HLVa-IT

*"Have you ever read vaccine materials, such as leaflets or posters in doctor's or public health units offices, recommending vaccinations?"*

☐ NO ☐ YES

If yes, fill in the box below, marking with an X the boxes corresponding to your choice (choose only one answer for each question)

| READING THE MATERIAL:                                                                     | Never                    | Rarely                   | Sometimes                | Often                    |
|-------------------------------------------------------------------------------------------|--------------------------|--------------------------|--------------------------|--------------------------|
| 1. Did you find that the material as a whole (texts and/or images) was difficult to read? | <input type="checkbox"/> | <input type="checkbox"/> | <input type="checkbox"/> | <input type="checkbox"/> |
| 2. Did he find words you didn't know?                                                     | <input type="checkbox"/> | <input type="checkbox"/> | <input type="checkbox"/> | <input type="checkbox"/> |
| 3. Did you find that the texts were difficult to understand?                              | <input type="checkbox"/> | <input type="checkbox"/> | <input type="checkbox"/> | <input type="checkbox"/> |
| 4. Did you need much time to understand them?                                             | <input type="checkbox"/> | <input type="checkbox"/> | <input type="checkbox"/> | <input type="checkbox"/> |
| 5. Did you or would you need someone to help you understand them?                         | <input type="checkbox"/> | <input type="checkbox"/> | <input type="checkbox"/> | <input type="checkbox"/> |

*"Have you ever thought or been advised to vaccinate yourself against one or more diseases?"*

☐ NO ☐ YES

If yes, fill in the box below, marking with an X the boxes corresponding to your choice (choose only one answer for each question)

| WHEN SEARCHING INFORMATION:                                                                     | Never                    | Rarely                   | Sometimes                | Often                    |
|-------------------------------------------------------------------------------------------------|--------------------------|--------------------------|--------------------------|--------------------------|
| 6. Have you consulted more than one source of information?                                      | <input type="checkbox"/> | <input type="checkbox"/> | <input type="checkbox"/> | <input type="checkbox"/> |
| 7. Did you find the information you were looking for?                                           | <input type="checkbox"/> | <input type="checkbox"/> | <input type="checkbox"/> | <input type="checkbox"/> |
| 8. Did you understand the information found?                                                    | <input type="checkbox"/> | <input type="checkbox"/> | <input type="checkbox"/> | <input type="checkbox"/> |
| 9. Have you had the opportunity to use the information?                                         | <input type="checkbox"/> | <input type="checkbox"/> | <input type="checkbox"/> | <input type="checkbox"/> |
| 10. Did you discuss what you understood about vaccinations with your doctor or other people?    | <input type="checkbox"/> | <input type="checkbox"/> | <input type="checkbox"/> | <input type="checkbox"/> |
| 11. Did you consider whether the information collected was about your condition?                | <input type="checkbox"/> | <input type="checkbox"/> | <input type="checkbox"/> | <input type="checkbox"/> |
| 12. Have you considered the credibility of the sources?                                         | <input type="checkbox"/> | <input type="checkbox"/> | <input type="checkbox"/> | <input type="checkbox"/> |
| 13. Did you check whether the information was correct?                                          | <input type="checkbox"/> | <input type="checkbox"/> | <input type="checkbox"/> | <input type="checkbox"/> |
| 14. Did you find any useful information to make a decision on whether or not to get vaccinated? | <input type="checkbox"/> | <input type="checkbox"/> | <input type="checkbox"/> | <input type="checkbox"/> |
